# Supplementary material
Source: PubMed Central journal article supplement (PMC5746458)
Supplement: NIHMS915217-supplement-Supp_TableS1.pdf [file NIHMS915217-supplement-Supp_TableS1.pdf]

**Suppl. Table 1. Immunoreactive cytokines detected in culture supernatants.** Shown are levels of canonical (IL3, IL5 and GMCSF) and non-canonical pro-survival cytokines (IL-13, eotaxin-1) detected in cultures of lung eosinophils ( $10^6$  cells per mL in RPMI with 10% FCS) from mice sensitized and challenged with *A. fumigatus*, from *IL5tg* mice, and from cell-free medium alone; -, beneath detectable limits; nd, not done; n = 3 – 6 samples per point.

| cytokine  | <i>Af</i> -challenged<br>(pg/mL) |            | <i>IL5tg</i><br>(pg/mL) |            | medium<br>(pg/mL) |
|-----------|----------------------------------|------------|-------------------------|------------|-------------------|
|           | 24 h                             | 72h        | 24 h                    | 72h        | -                 |
| IL3       | -                                | -          | -                       | -          | -                 |
| IL5       | 8.3 ± 4.1                        | 6.8 ± 2.1  | 2.7 ± 0.62              | 4.7 ± 0.09 | 18 ± 2.2          |
| GM-CSF    | -                                | -          | -                       | -          | -                 |
| IL13      | 9.9 ± 0.04                       | 7.4 ± 0.85 | 8.1 ± 0.57              | 11.0 ± 2.5 | 11.2 ± 1.8        |
| Eotaxin-1 | 6.5 ± 0.20                       | nd         | 6.3 ± 0.52              | 5.3 ± 0.22 | 5.0 ± 0.25        |
